# Supplementary material for: Informed consent in randomised controlled trials: development and preliminary evaluation of a measure of Participatory and Informed Consent (PIC)
Source: Springer Nature journal article supplement (doi:10.1186/s13063-017-2048-7), 2017-07-17
Supplement: MOESM1 [file 13310104]

**Additional file 1**

**Appendix A**

**DevPICv1**

**Participatory and Informed Consent for trial recruitment**

**Section A: Descriptive information about the consultation**

|                                                                                    |                |                                                        |  |
|------------------------------------------------------------------------------------|----------------|--------------------------------------------------------|--|
| Consultation reference                                                             |                | Rater's initials                                       |  |
| Recruiter ID                                                                       |                | Date of rating                                         |  |
| Time taken to rate                                                                 |                | Length of consultation if known                        |  |
| Trial treatment arms                                                               | 1.<br>2.<br>3. | Decision outcome in terms of participation (if known): |  |
| Comments e.g. analysis process, nature of consultation, quality of audio recording |                |                                                        |  |

**IC = informed consent**

**P= Patient**

**R= recruiter**

**P2=significant other accompanying patient**

**R2 = second recruiter**

## Section B Detailed analysis of R information provision and P understanding

|                                                         | Start time (h:m) | Finish time (h:m) | Total time (h:m) |
|---------------------------------------------------------|------------------|-------------------|------------------|
| Total time taken to rate all of section C (parts i-iii) |                  |                   |                  |

### i) Diagnosis & management options

| Topic                                                                                                | R covers information on:                          |              |  |  | Clarity of R information on: |            |  |  | P talks about:                                    |              |  |  | Based on evidence of Ps contributions, P understands information on: |              |  |  |
|------------------------------------------------------------------------------------------------------|---------------------------------------------------|--------------|--|--|------------------------------|------------|--|--|---------------------------------------------------|--------------|--|--|----------------------------------------------------------------------|--------------|--|--|
|                                                                                                      | Not at all                                        | Very much so |  |  | Not at all clear             | Very clear |  |  | Not at all                                        | Very much so |  |  | Not at all                                                           | Very much so |  |  |
| 1. Purpose of consultation                                                                           | 1a<br>0 1 2 3<br><i>If 0 mark next column N/A</i> |              |  |  | 1b<br>0 1 2 3<br>N/A         |            |  |  | 1c<br>0 1 2 3<br><i>If 0 mark next column N/A</i> |              |  |  | 1d<br>0 1 2 3<br>N/A                                                 |              |  |  |
| 2. Relevant history: diagnosis and management to date                                                | 2a<br>0 1 2 3<br><i>If 0 mark next column N/A</i> |              |  |  | 2b<br>0 1 2 3<br>N/A         |            |  |  | 2c<br>0 1 2 3<br><i>If 0 mark next column N/A</i> |              |  |  | 2d<br>0 1 2 3<br>N/A                                                 |              |  |  |
| 3. Current management options<br><br>(independent of study)                                          | 3a<br>0 1 2 3<br><i>If 0 mark next column N/A</i> |              |  |  | 3b<br>0 1 2 3<br>N/A         |            |  |  | 3c<br>0 1 2 3<br><i>If 0 mark next column N/A</i> |              |  |  | 3d<br>0 1 2 3<br>N/A                                                 |              |  |  |
| 4. Clinical equipoise: no evidence to suggest any treatment will give a better outcome than other(s) | 4a<br>0 1 2 3<br><i>If 0 mark next column N/A</i> |              |  |  | 4b<br>0 1 2 3<br>N/A         |            |  |  | 4c<br>0 1 2 3<br><i>If 0 mark next column N/A</i> |              |  |  | 4d<br>0 1 2 3<br>N/A                                                 |              |  |  |
| Total score n/12                                                                                     | /12                                               |              |  |  | /12                          |            |  |  | /12                                               |              |  |  | /12                                                                  |              |  |  |
| Comments                                                                                             |                                                   |              |  |  |                              |            |  |  |                                                   |              |  |  |                                                                      |              |  |  |

## ii) Study purpose & treatments

| Topic                                                             | R covers information on:                           |              |  |  | Clarity of R information on: |            |  |  | P talks about:                                     |              |  |  | Based on evidence of Ps contributions, P understands information on: |              |  |  |
|-------------------------------------------------------------------|----------------------------------------------------|--------------|--|--|------------------------------|------------|--|--|----------------------------------------------------|--------------|--|--|----------------------------------------------------------------------|--------------|--|--|
|                                                                   | Not at all                                         | Very much so |  |  | Not at all clear             | Very clear |  |  | Not at all                                         | Very much so |  |  | Not at all                                                           | Very much so |  |  |
| 5. Research study purpose or question                             | 5a<br>0 1 2 3<br><i>If 0 mark next column N/A</i>  |              |  |  | 5b<br>0 1 2 3<br>N/A         |            |  |  | 5c<br>0 1 2 3<br><i>If 0 mark next column N/A</i>  |              |  |  | 5d<br>0 1 2 3<br>N/A                                                 |              |  |  |
| 6. Trial arm 1 processes<br>.....<br>(Name treatment)             | 6a<br>0 1 2 3<br><i>If 0 mark next column N/A</i>  |              |  |  | 6b<br>0 1 2 3<br>N/A         |            |  |  | 6c<br>0 1 2 3<br><i>If 0 mark next column N/A</i>  |              |  |  | 6d<br>0 1 2 3<br>N/A                                                 |              |  |  |
| 7. Trial arm 1 disadvantages or risks                             | 7a<br>0 1 2 3<br><i>If 0 mark next column N/A</i>  |              |  |  | 7b<br>0 1 2 3<br>N/A         |            |  |  | 7c<br>0 1 2 3<br><i>If 0 mark next column N/A</i>  |              |  |  | 7d<br>0 1 2 3<br>N/A                                                 |              |  |  |
| 8. Trial arm 1 advantages or benefits                             | 8a<br>0 1 2 3<br><i>If 0 mark next column N/A</i>  |              |  |  | 8b<br>0 1 2 3<br>N/A         |            |  |  | 8c<br>0 1 2 3<br><i>If 0 mark next column N/A</i>  |              |  |  | 8d<br>0 1 2 3<br>N/A                                                 |              |  |  |
| 9. Trial arm 2 processes<br>.....<br>(Name treatment)             | 9a<br>0 1 2 3<br><i>If 0 mark next column N/A</i>  |              |  |  | 9b<br>0 1 2 3<br>N/A         |            |  |  | 9c<br>0 1 2 3<br><i>If 0 mark next column N/A</i>  |              |  |  | 9d<br>0 1 2 3<br>N/A                                                 |              |  |  |
| 10. Trial arm 2 disadvantages or risks                            | 10a<br>0 1 2 3<br><i>If 0 mark next column N/A</i> |              |  |  | 10b<br>0 1 2 3<br>N/A        |            |  |  | 10c<br>0 1 2 3<br><i>If 0 mark next column N/A</i> |              |  |  | 10d<br>0 1 2 3<br>N/A                                                |              |  |  |
| 11. Trial arm 2 advantages or benefits                            | 11a<br>0 1 2 3<br><i>If 0 mark next column N/A</i> |              |  |  | 11b<br>0 1 2 3<br>N/A        |            |  |  | 11c<br>0 1 2 3<br><i>If 0 mark next column N/A</i> |              |  |  | 11d<br>0 1 2 3<br>N/A                                                |              |  |  |
| 12. Trial arm 3 processes<br>N/A<br>Name.....<br>If N/A go to Q15 | 12a<br>0 1 2 3<br><i>If 0 mark next column N/A</i> |              |  |  | 12b<br>0 1 2 3<br>N/A        |            |  |  | 12c<br>0 1 2 3<br><i>If 0 mark next column N/A</i> |              |  |  | 12d<br>0 1 2 3<br>N/A                                                |              |  |  |
| 13. Trial arm 3 disadvantages or risks                            | 13a<br>0 1 2 3<br><i>If 0 mark next column N/A</i> |              |  |  | 13b<br>0 1 2 3<br>N/A        |            |  |  | 13c<br>0 1 2 3<br><i>If 0 mark next column N/A</i> |              |  |  | 13d<br>0 1 2 3<br>N/A                                                |              |  |  |

| Topic                                 | R covers information on:                           |              |  |  | Clarity of R information on: |            |  |  | P talks about:                                     |              |  |  | Based on evidence of Ps contributions, P understands information on: |              |  |  |
|---------------------------------------|----------------------------------------------------|--------------|--|--|------------------------------|------------|--|--|----------------------------------------------------|--------------|--|--|----------------------------------------------------------------------|--------------|--|--|
|                                       | Not at all                                         | Very much so |  |  | Not at all clear             | Very clear |  |  | Not at all                                         | Very much so |  |  | Not at all                                                           | Very much so |  |  |
| 14.Trial arm 3 advantages or benefits | 14a<br>0 1 2 3<br><i>If 0 mark next column N/A</i> |              |  |  | 14b<br>0 1 2 3<br>N/A        |            |  |  | 14c<br>0 1 2 3<br><i>If 0 mark next column N/A</i> |              |  |  | 14d<br>0 1 2 3<br>N/A                                                |              |  |  |
| Total                                 | If 2 arm trial = /21                               |              |  |  | If 2 arm trial = /21         |            |  |  | If 2 arm trial = /21                               |              |  |  | If 2 arm trial = /21                                                 |              |  |  |
| If 2 arm trial = /21                  |                                                    |              |  |  |                              |            |  |  |                                                    |              |  |  |                                                                      |              |  |  |
| If 3 arm trial= /30                   | If 3 arm trial= /30                                |              |  |  | If 3 arm trial= /30          |            |  |  | If 3 arm trial= /30                                |              |  |  | If 3 arm trial= /30                                                  |              |  |  |
| Comments                              |                                                    |              |  |  |                              |            |  |  |                                                    |              |  |  |                                                                      |              |  |  |

### iii Study procedures

| Topic                                                                                                                      | R covers information on:                           |   |   |              | Clarity of R information on: |   |   |            | P talks about:                                     |   |   |              | Based on evidence of Ps contributions, P understands information on: |   |   |              |
|----------------------------------------------------------------------------------------------------------------------------|----------------------------------------------------|---|---|--------------|------------------------------|---|---|------------|----------------------------------------------------|---|---|--------------|----------------------------------------------------------------------|---|---|--------------|
|                                                                                                                            | Not at all                                         | 1 | 2 | Very much so | Not at all clear             | 1 | 2 | Very clear | Not at all                                         | 1 | 2 | Very much so | Not at all                                                           | 1 | 2 | Very much so |
| 15. Reason for randomisation (e.g. prevent selection bias, produce generalizable results)                                  | 15a<br>0 1 2 3<br><i>If 0 mark next column N/A</i> |   |   |              | 15b<br>0 1 2 3<br>N/A        |   |   |            | 15c<br>0 1 2 3<br><i>If 0 mark next column N/A</i> |   |   |              | 15d<br>0 1 2 3<br>N/A                                                |   |   |              |
| 16. Process of randomisation (only if explicit that it is a chance allocation score =2+)                                   | 16a<br>0 1 2 3<br><i>If 0 mark next column N/A</i> |   |   |              | 16b<br>0 1 2 3<br>N/A        |   |   |            | 16c<br>0 1 2 3<br><i>If 0 mark next column N/A</i> |   |   |              | 16d<br>0 1 2 3<br>N/A                                                |   |   |              |
| 17. Option to refuse randomisation (if is a pragmatic trial & participation is possible following treatment choice)<br>N/A | 17a<br>0 1 2 3<br><i>If 0 mark next column N/A</i> |   |   |              | 17b<br>0 1 2 3<br>N/A        |   |   |            | 17c<br>0 1 2 3<br><i>If 0 mark next column N/A</i> |   |   |              | 17d<br>0 1 2 3<br>N/A                                                |   |   |              |
| 18. Implications of randomisation for P (e.g. removes choice but takes away dilemma)                                       | 18a<br>0 1 2 3<br><i>If 0 mark next column N/A</i> |   |   |              | 18b<br>0 1 2 3<br>N/A        |   |   |            | 18c<br>0 1 2 3<br><i>If 0 mark next column N/A</i> |   |   |              | 18d<br>0 1 2 3<br>N/A                                                |   |   |              |
| 19. Benefits of being in study (e.g. longer follow-up, people in studies fare better)                                      | 19a<br>0 1 2 3<br><i>If 0 mark next column N/A</i> |   |   |              | 19b<br>0 1 2 3<br>N/A        |   |   |            | 19c<br>0 1 2 3<br><i>If 0 mark next column N/A</i> |   |   |              | 19d<br>0 1 2 3<br>N/A                                                |   |   |              |
| 20. Costs or burden of being in study (e.g. additional appts, samples, questionnaires, duration of commitment)             | 20a<br>0 1 2 3<br><i>If 0 mark next column N/A</i> |   |   |              | 20b<br>0 1 2 3<br>N/A        |   |   |            | 20c<br>0 1 2 3<br><i>If 0 mark next column N/A</i> |   |   |              | 20d<br>0 1 2 3<br>N/A                                                |   |   |              |
| 21. Options for further consultations in decision making re trial participation                                            | 21a<br>0 1 2 3<br><i>If 0 mark next column N/A</i> |   |   |              | 21b<br>0 1 2 3<br>N/A        |   |   |            | 21c<br>0 1 2 3<br><i>If 0 mark next column N/A</i> |   |   |              | 21d<br>0 1 2 3<br>N/A                                                |   |   |              |
| 22. Option to refuse or withdraw from participation at any time                                                            | 22a<br>0 1 2 3<br><i>If 0 mark next column N/A</i> |   |   |              | 22b<br>0 1 2 3<br>N/A        |   |   |            | 22c<br>0 1 2 3<br><i>If 0 mark next column N/A</i> |   |   |              | 22d<br>0 1 2 3<br>N/A                                                |   |   |              |

| 23. Outlines benefits (financial & other) to professional/organisation of P participation | 23a                              |   |   |   | 23b |   |   |   | 23c                              |   |   |   | 23d |   |   |   |
|-------------------------------------------------------------------------------------------|----------------------------------|---|---|---|-----|---|---|---|----------------------------------|---|---|---|-----|---|---|---|
|                                                                                           | 0                                | 1 | 2 | 3 | 0   | 1 | 2 | 3 | 0                                | 1 | 2 | 3 | 0   | 1 | 2 | 3 |
| N/A                                                                                       | <i>If 0 mark next column N/A</i> |   |   |   | N/A |   |   |   | <i>If 0 mark next column N/A</i> |   |   |   | N/A |   |   |   |
| <b>Totals</b>                                                                             | n/27                             |   |   |   | /27 |   |   |   | /27                              |   |   |   | /27 |   |   |   |
| <b>Comments</b>                                                                           |                                  |   |   |   |     |   |   |   |                                  |   |   |   |     |   |   |   |

**Appendix B**

**DevPICv2**

**Participatory and Informed Consent for trial recruitment**

**Section 1: Descriptive information about the consultation**

|                                                                                    |                                                                                                                                                                               |                                                                                                |                        |
|------------------------------------------------------------------------------------|-------------------------------------------------------------------------------------------------------------------------------------------------------------------------------|------------------------------------------------------------------------------------------------|------------------------|
| Rater ID                                                                           |                                                                                                                                                                               | Date of rating                                                                                 |                        |
| Total time taken to rate                                                           | Start time (h:m)                                                                                                                                                              | Finish time (h:m)                                                                              | Total time (h:m)       |
| Consultation ID                                                                    |                                                                                                                                                                               | Trial ID                                                                                       |                        |
| Recruiter ID                                                                       |                                                                                                                                                                               | Recruiter's Profession                                                                         |                        |
| Length of consultation (h:m)                                                       |                                                                                                                                                                               | People present<br>R1 = recruiter<br>R2 = second recruiter<br>P1 = patient<br>P2= friend/family |                        |
| Trial treatment arms                                                               | 1.                                                                                                                                                                            |                                                                                                |                        |
|                                                                                    | 2.                                                                                                                                                                            |                                                                                                |                        |
|                                                                                    | 3.                                                                                                                                                                            |                                                                                                |                        |
| Decision outcome in terms of participation                                         | e.g. Unknown / Randomised & accepted allocation / Randomised & took time to consider / Randomised & rejected allocation / Refused randomisation & chose treatment / Undecided |                                                                                                |                        |
|                                                                                    | Scene setting                                                                                                                                                                 | Study treatments                                                                               | Study procedures       |
| Score R info provision                                                             | Section 2 i a<br>/24                                                                                                                                                          | Section 2 ii a<br>/18 /27                                                                      | Section 2 iii a<br>/24 |
|                                                                                    |                                                                                                                                                                               |                                                                                                | Total<br>/60 /69       |
| Score P understanding                                                              | Section 2 i a<br>/24                                                                                                                                                          | Section 2 ii a<br>/18 /27                                                                      | Section 2 iii a<br>/24 |
|                                                                                    |                                                                                                                                                                               |                                                                                                | Total<br>/60 /69       |
| Comments e.g. analysis process, nature of consultation, quality of audio recording |                                                                                                                                                                               |                                                                                                |                        |

## Section 2: R information provision and evidence of P understanding

**i) Scene setting:** consultation purpose, relevant history/diagnosis, management options, equipoise, reason for trial/randomisation

| Topic                                                                                               | a. R information provision is: |                     |                   |                 | b. P contributions suggest:<br>(circle most appropriate box) |   |
|-----------------------------------------------------------------------------------------------------|--------------------------------|---------------------|-------------------|-----------------|--------------------------------------------------------------|---|
|                                                                                                     | 0<br>Absent                    | 1<br>Mostly unclear | 2<br>Mostly clear | 3<br>Very clear |                                                              |   |
| 1. Purpose of consultation                                                                          |                                |                     |                   |                 | Evidence of misunderstanding                                 | 0 |
|                                                                                                     |                                |                     |                   |                 | No evidence available                                        | 1 |
|                                                                                                     |                                |                     |                   |                 | Minimal evidence of understanding                            | 2 |
|                                                                                                     |                                |                     |                   |                 | Adequate evidence of understanding                           | 3 |
| 2. Relevant history: diagnosis and management to date                                               |                                |                     |                   |                 | Evidence of misunderstanding                                 | 0 |
|                                                                                                     |                                |                     |                   |                 | No evidence available                                        | 1 |
|                                                                                                     |                                |                     |                   |                 | Minimal evidence of understanding                            | 2 |
|                                                                                                     |                                |                     |                   |                 | Adequate evidence of understanding                           | 3 |
| 3. Currently available management options within standard care                                      |                                |                     |                   |                 | Evidence of misunderstanding                                 | 0 |
|                                                                                                     |                                |                     |                   |                 | No evidence available                                        | 1 |
|                                                                                                     |                                |                     |                   |                 | Minimal evidence of understanding                            | 2 |
|                                                                                                     |                                |                     |                   |                 | Adequate evidence of understanding                           | 3 |
| 4. Management options evaluated within trial                                                        |                                |                     |                   |                 | Evidence of misunderstanding                                 | 0 |
|                                                                                                     |                                |                     |                   |                 | No evidence available                                        | 1 |
|                                                                                                     |                                |                     |                   |                 | Minimal evidence of understanding                            | 2 |
|                                                                                                     |                                |                     |                   |                 | Adequate evidence of understanding                           | 3 |
| 5. Clinical equipoise (no evidence to suggest any treatment is better than other(s))                |                                |                     |                   |                 | Evidence of misunderstanding                                 | 0 |
|                                                                                                     |                                |                     |                   |                 | No evidence available                                        | 1 |
|                                                                                                     |                                |                     |                   |                 | Minimal evidence of understanding                            | 2 |
|                                                                                                     |                                |                     |                   |                 | Adequate evidence of understanding                           | 3 |
| 6. Trial purpose or question (collect evidence as to whether one treatment is better than other(s)) |                                |                     |                   |                 | Evidence of misunderstanding                                 | 0 |
|                                                                                                     |                                |                     |                   |                 | No evidence available                                        | 1 |
|                                                                                                     |                                |                     |                   |                 | Minimal evidence of understanding                            | 2 |
|                                                                                                     |                                |                     |                   |                 | Adequate evidence of understanding                           | 3 |
| 7. Reason for randomisation (create two groups the same except for which treatment each group gets) |                                |                     |                   |                 | Evidence of misunderstanding                                 | 0 |
|                                                                                                     |                                |                     |                   |                 | No evidence available                                        | 1 |
|                                                                                                     |                                |                     |                   |                 | Minimal evidence of understanding                            | 2 |
|                                                                                                     |                                |                     |                   |                 | Adequate evidence of understanding                           | 3 |
| 8. Process of randomisation (must refer to chance allocation)                                       |                                |                     |                   |                 | Evidence of misunderstanding                                 | 0 |
|                                                                                                     |                                |                     |                   |                 | No evidence available                                        | 1 |
|                                                                                                     |                                |                     |                   |                 | Minimal evidence of understanding                            | 2 |
|                                                                                                     |                                |                     |                   |                 | Adequate evidence of understanding                           | 3 |



|             |     |     |
|-------------|-----|-----|
| Total score | /24 | /24 |
|-------------|-----|-----|

Comments arising during rating Section2 i

## ii) Trial treatments

| Topic                                   | a. R information provision is: |                     |                   |                 | b. P interaction suggests (tick box) |   |
|-----------------------------------------|--------------------------------|---------------------|-------------------|-----------------|--------------------------------------|---|
|                                         | 0<br>Absent                    | 1<br>Mostly unclear | 2<br>Mostly clear | 3<br>Very clear |                                      |   |
| 9. Trial arm 1 processes                |                                |                     |                   |                 | Evidence of misunderstanding         | 0 |
|                                         |                                |                     |                   |                 | No evidence available                | 1 |
|                                         |                                |                     |                   |                 | Minimal evidence of understanding    | 2 |
|                                         |                                |                     |                   |                 | Adequate evidence of understanding   | 3 |
| 10. Trial arm 1 costs or disadvantages  |                                |                     |                   |                 | Evidence of misunderstanding         | 0 |
|                                         |                                |                     |                   |                 | No evidence available                | 1 |
|                                         |                                |                     |                   |                 | Minimal evidence of understanding    | 2 |
|                                         |                                |                     |                   |                 | Adequate evidence of understanding   | 3 |
| 11. Trial arm 1 benefits or advantages  |                                |                     |                   |                 | Evidence of misunderstanding         | 0 |
|                                         |                                |                     |                   |                 | No evidence available                | 1 |
|                                         |                                |                     |                   |                 | Minimal evidence of understanding    | 2 |
|                                         |                                |                     |                   |                 | Adequate evidence of understanding   | 3 |
| 12. Trial arm 2 processes               |                                |                     |                   |                 | Evidence of misunderstanding         | 0 |
|                                         |                                |                     |                   |                 | No evidence available                | 1 |
|                                         |                                |                     |                   |                 | Minimal evidence of understanding    | 2 |
|                                         |                                |                     |                   |                 | Adequate evidence of understanding   | 3 |
| 13. Trial arm 2 costs or disadvantages. |                                |                     |                   |                 | Evidence of misunderstanding         | 0 |
|                                         |                                |                     |                   |                 | No evidence available                | 1 |
|                                         |                                |                     |                   |                 | Minimal evidence of understanding    | 2 |
|                                         |                                |                     |                   |                 | Adequate evidence of understanding   | 3 |
| 14. Trial arm 2 benefits or advantages  |                                |                     |                   |                 | Evidence of misunderstanding         | 0 |
|                                         |                                |                     |                   |                 | No evidence available                | 1 |
|                                         |                                |                     |                   |                 | Minimal evidence of understanding    | 2 |
|                                         |                                |                     |                   |                 | Adequate evidence of understanding   | 3 |
| 15. Trial arm 3 processes               |                                |                     |                   |                 | Evidence of misunderstanding         | 0 |
|                                         |                                |                     |                   |                 | No evidence available                | 1 |
|                                         |                                |                     |                   |                 | Minimal evidence of understanding    | 2 |
|                                         |                                |                     |                   |                 | Adequate evidence of understanding   | 3 |
| 16. Trial arm 3 costs or disadvantages  |                                |                     |                   |                 | Evidence of misunderstanding         | 0 |
|                                         |                                |                     |                   |                 | No evidence available                | 1 |
|                                         |                                |                     |                   |                 | Minimal evidence of understanding    | 2 |
|                                         |                                |                     |                   |                 | Adequate evidence of understanding   | 3 |

|                                        |             |                     |                   |                 |                                   |   |
|----------------------------------------|-------------|---------------------|-------------------|-----------------|-----------------------------------|---|
| 17. Trial arm 3 benefits or advantages | 0<br>Absent | 1<br>Mostly unclear | 2<br>Mostly clear | 3<br>Very clear | Evidence of misunderstanding      | 0 |
|                                        |             |                     |                   |                 | No evidence available             | 1 |
|                                        |             |                     |                   |                 | Minimal evidence of understanding | 2 |
|                                        |             |                     |                   |                 | Evidence of understanding         | 3 |
| Total score                            | /18 or /27  |                     |                   |                 | /18 or /27                        |   |

Comments Section 2ii

## lii) Trial procedures

| Topic                                                                                              | a. R information provision is: |                     |                   |                 | b. P interaction suggests:         |   |
|----------------------------------------------------------------------------------------------------|--------------------------------|---------------------|-------------------|-----------------|------------------------------------|---|
|                                                                                                    | 0<br>Absent                    | 1<br>Mostly unclear | 2<br>Mostly clear | 3<br>Very clear |                                    |   |
| 18. Advantages or benefits of trial participation                                                  | 0<br>Absent                    | 1<br>Mostly unclear | 2<br>Mostly clear | 3<br>Very clear | Evidence of misunderstanding       | 0 |
|                                                                                                    |                                |                     |                   |                 | No evidence available              | 1 |
|                                                                                                    |                                |                     |                   |                 | Minimal evidence of understanding  | 2 |
|                                                                                                    |                                |                     |                   |                 | Adequate evidence of understanding | 3 |
| 19. Costs / risks of trial participation.                                                          | 0<br>Absent                    | 1<br>Mostly unclear | 2<br>Mostly clear | 3<br>Very clear | Evidence of misunderstanding       | 0 |
|                                                                                                    |                                |                     |                   |                 | No evidence available              | 1 |
|                                                                                                    |                                |                     |                   |                 | Minimal evidence of understanding  | 2 |
|                                                                                                    |                                |                     |                   |                 | Adequate evidence of understanding | 3 |
| 20. Option to refuse participation.                                                                | 0<br>Absent                    | 1<br>Mostly unclear | 2<br>Mostly clear | 3<br>Very clear | Evidence of misunderstanding       | 0 |
|                                                                                                    |                                |                     |                   |                 | No evidence available              | 1 |
|                                                                                                    |                                |                     |                   |                 | Minimal evidence of understanding  | 2 |
|                                                                                                    |                                |                     |                   |                 | Adequate evidence of understanding | 3 |
| 21. Option to withdraw from participation.                                                         | 0<br>Absent                    | 1<br>Mostly unclear | 2<br>Mostly clear | 3<br>Very clear | Evidence of misunderstanding       | 0 |
|                                                                                                    |                                |                     |                   |                 | No evidence available              | 1 |
|                                                                                                    |                                |                     |                   |                 | Minimal evidence of understanding  | 2 |
|                                                                                                    |                                |                     |                   |                 | Adequate evidence of understanding | 3 |
| 22. Options for further consultation to support decision making                                    | 0<br>Absent                    | 1<br>Mostly unclear | 2<br>Mostly clear | 3<br>Very clear | Evidence of misunderstanding       | 0 |
|                                                                                                    |                                |                     |                   |                 | No evidence available              | 1 |
|                                                                                                    |                                |                     |                   |                 | Minimal evidence of understanding  | 2 |
|                                                                                                    |                                |                     |                   |                 | Adequate evidence of understanding | 3 |
| 23. Outlines benefits (financial or otherwise) to professional or organisation of P participation. | 0<br>Absent                    | 1<br>Mostly unclear | 2<br>Mostly clear | 3<br>Very clear | Evidence of misunderstanding       | 0 |
|                                                                                                    |                                |                     |                   |                 | No evidence available              | 1 |
|                                                                                                    |                                |                     |                   |                 | Minimal evidence of understanding  | 2 |
|                                                                                                    |                                |                     |                   |                 | Adequate evidence of understanding | 3 |
| 24. Outlines measures to protect confidentiality of participant data                               | 0<br>Absent                    | 1<br>Mostly unclear | 2<br>Mostly clear | 3<br>Very clear | Evidence of misunderstanding       | 0 |
|                                                                                                    |                                |                     |                   |                 | No evidence available              | 1 |
|                                                                                                    |                                |                     |                   |                 | Minimal evidence of understanding  | 2 |
|                                                                                                    |                                |                     |                   |                 | Adequate evidence of understanding | 3 |
| 25. Outlines measures for compensation in case of adverse events                                   | 0<br>Absent                    | 1<br>Mostly unclear | 2<br>Mostly clear | 3<br>Very clear | Evidence of misunderstanding       | 0 |
|                                                                                                    |                                |                     |                   |                 | No evidence available              | 1 |
|                                                                                                    |                                |                     |                   |                 | Minimal evidence of understanding  | 2 |
|                                                                                                    |                                |                     |                   |                 | Adequate evidence of understanding | 3 |

|             |     |     |
|-------------|-----|-----|
| Total score | /24 | /24 |
|-------------|-----|-----|

COmments on Part 2iii

### Section 3: Global Judgements

Please respond to the following questions as applied up to the point of decision making about whether to accept the option to randomize or the end of the appointment. Please circle your response and add any comments below.

Does the recruiter consistently convey a position of equipoise and what evidence do you have to suggest this?

Yes

Insufficient evidence

No

Comments:

Do you believe the patient is in equipoise and what evidence do you have to suggest this?

Yes

Insufficient evidence

No

Comments:

Do you believe the patient accepts randomisation as a way to determine treatment and what evidence do you have to support this?

Yes

Insufficient evidence

No

Comments:

Do you believe that the patient is sufficiently informed by the end of the consultation to make an informed decision and what evidence do you have to support this?

Yes

Insufficient evidence

No

Comments:

**Section 4 Ethnographic commentary of what occurs within the consultation.**

There are no constraints on what can be included here. Feel free to add observations about **any elements of recruiter or patient contributions that stand out in this consultation** as regards **what** is discussed, **how** it is discussed and **how** it is understood.

Observations from this section will be used to develop the next version of the measure so please add comments on key issues that you feel need capturing and are not yet captured elsewhere. Shorthand notes are perfectly acceptable rather than written prose. It is intended that this section should be completed in around 10 minutes.
